# Supplementary material for: Screening for cocrystals of succinic acid and 4-aminobenzoic acid
Source: Royal Society of Chemistry journal article supplement (doi:10.1039/c2ce06325e), 2012-01-01
Supplement: c2ce06325e.pdf [file c2ce06325e.pdf]

# Screening for cocrystals of succinic acid and 4-aminobenzoic acid

Nizar Issa, Sarah A. Barnett, Sharmarke Mohamed, Doris E. Braun, Royston C. B. Copley, Derek A. Tocher, Sarah L Price\*

## Supplementary Information

### Contents

|       |                                                      |    |
|-------|------------------------------------------------------|----|
| 1     | Solubility of the ten APIs and two coformers.....    | 2  |
| 2     | Infrared spectroscopy of the novel cocrystals.....   | 3  |
| 3     | Summary of experimental screening results .....      | 5  |
| 4     | Single crystal X-ray diffraction.....                | 6  |
| 4.1   | Succinic acid • 2,2-bipyridine (I) .....             | 6  |
| 4.2   | Succinic acid • diphencyclopropanone (II) .....      | 6  |
| 4.3   | 4-Aminobenzoic acid • antipyrine (III).....          | 7  |
| 4.4   | 4-Aminobenzoic acid • phenazine (IV).....            | 8  |
| 5     | Computational.....                                   | 10 |
| 5.1   | Conformational Analysis of succinic acid .....       | 10 |
| 5.2   | Details of the lattice energy landscapes .....       | 12 |
| 5.2.1 | Succinic acid .....                                  | 13 |
| 5.2.2 | Dicyanobenzene .....                                 | 15 |
| 5.2.3 | Bipyridine .....                                     | 16 |
| 5.2.4 | Succinic acid•2,2'bipyridine cocrystal.....          | 17 |
| 5.2.5 | Succinic acid•1,4-dicyanobenzene 1:1 cocrystal ..... | 18 |

## 1 Solubility of the ten APIs and two coformers

**Table S1.** Solubility measurements.

| Compound                           | Soluble <sup>a</sup>                                                            | Partially soluble <sup>b</sup>                                              | Practically insoluble <sup>c</sup>                                  |
|------------------------------------|---------------------------------------------------------------------------------|-----------------------------------------------------------------------------|---------------------------------------------------------------------|
| 4-Aminobenzoic acid                | Acetone<br>Acetonitrile<br>Ethanol<br>Ethyl acetate<br>Methanol                 | Diethyl ether<br>1,4-Dioxane<br>Nitromethane<br>Water                       |                                                                     |
| Succinic acid                      | Ethanol<br>Ethyl acetate<br>Methanol                                            | Acetone<br>Acetonitrile<br>Diethyl ether<br>1,4-Dioxane, Water              | Nitromethane                                                        |
| Metyrapone                         | Acetone<br>1,4-Dioxane<br>Acetonitrile                                          | Diethyl ether<br>Ethanol<br>Ethyl acetate<br>Methanol                       | Nitromethane<br>Water                                               |
| β-Methyl-β-Nitrostyrene            | Acetone<br>Ethanol<br>Ethyl Acetate<br>Methanol                                 | Acetonitrile<br>Diethyl ether<br>1,4-Dioxane<br>Nitromethane                | Water                                                               |
| Bifonazole                         | Acetone<br>1,4-Dioxane<br>Methanol                                              | Acetonitrile<br>Diethyl ether<br>Ethanol<br>Ethyl acetate                   | Nitromethane<br>Water                                               |
| 1,4-Dicyanobenzene                 | Acetone<br>Acetonitrile<br>Methanol                                             | 1,4-Dioxane<br>Ethanol                                                      | Diethyl ether<br>Ethyl acetate<br>Nitromethane<br>Water             |
| 1-(5-Nitro-2-Pyridyl)Benzotriazole |                                                                                 | Acetone<br>Ethyl acetate<br>Nitromethane<br>Water                           | Acetonitrile<br>Diethyl ether<br>1,4-Dioxane<br>Ethanol<br>Methanol |
| 1-(2-Pyridyl)Benzotriazole         | Acetone<br>Ethyl Acetate                                                        | Acetonitrile<br>Diethyl ether<br>Ethanol<br>Methanol                        | 1,4-Dioxane<br>Nitromethane<br>Water                                |
| Phenazine                          | Acetone<br>Diethyl ether<br>1,4-Dioxane                                         | Acetonitrile<br>Ethanol<br>Ethyl acetate<br>Methanol<br>Nitromethane, Water |                                                                     |
| Diphenylcyclopropenone             | Acetone<br>Acetonitrile<br>1,4-Dioxane<br>Ethanol<br>Ethyl acetate<br>Methanol  | Diethyl ether<br>Nitromethane<br>Water                                      |                                                                     |
| Antipyrine                         | Acetone<br>Diethyl ether<br>1,4-Dioxane<br>Ethanol<br>Ethyl acetate<br>Methanol | Nitromethane<br>Water<br>Acetonitrile                                       |                                                                     |
| 2,2-Bipyridine                     | Acetone<br>Acetonitrile<br>Ethanol<br>Ethyl acetate<br>Methanol                 | Diethyl ether<br>1,4-Dioxane<br>Nitromethane<br>Water                       |                                                                     |

30 mg of the compound were placed in 10 mL of each of the nine solvent at room temperature and by visual evaluation the solvents were classified as <sup>a</sup>soluble: compound fully dissolved, <sup>b</sup>partially soluble: some or most of the compound dissolved and <sup>c</sup>practically insoluble: little or none of the compound dissolved.

## 2 Infrared spectroscopy of the novel cocrystals

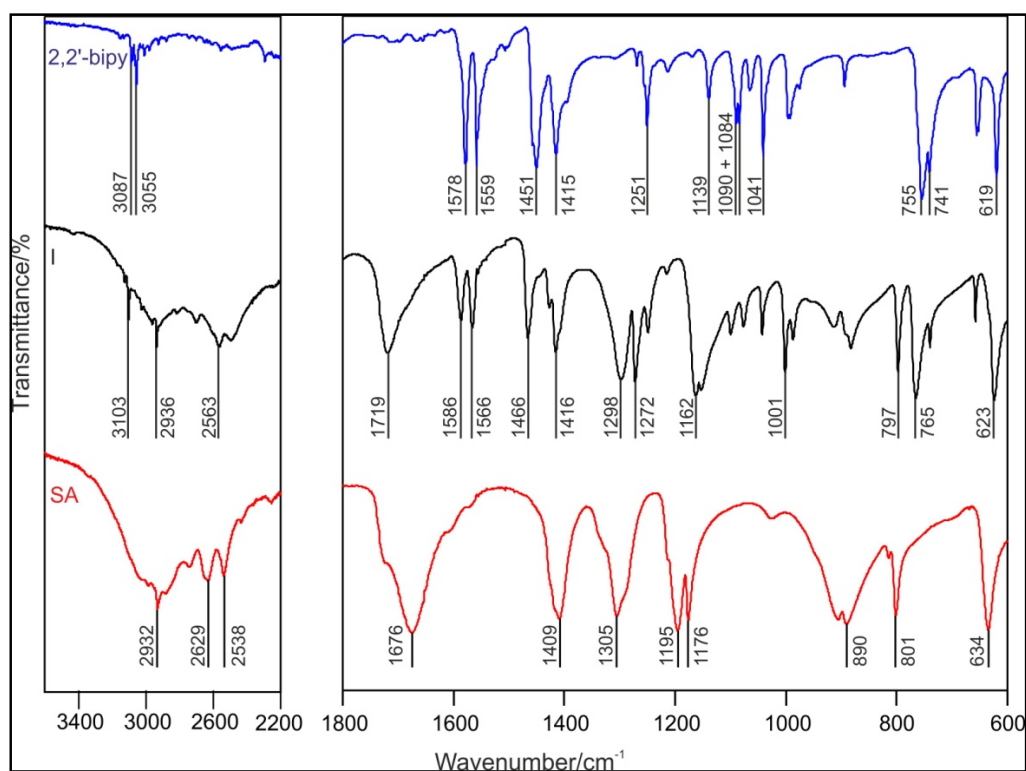

**Figure S1.** The IR spectra of 2,2'-bipyridine (blue), the cocrystal (I) produced by grinding (black), and  $\beta$ -succinic acid (red).

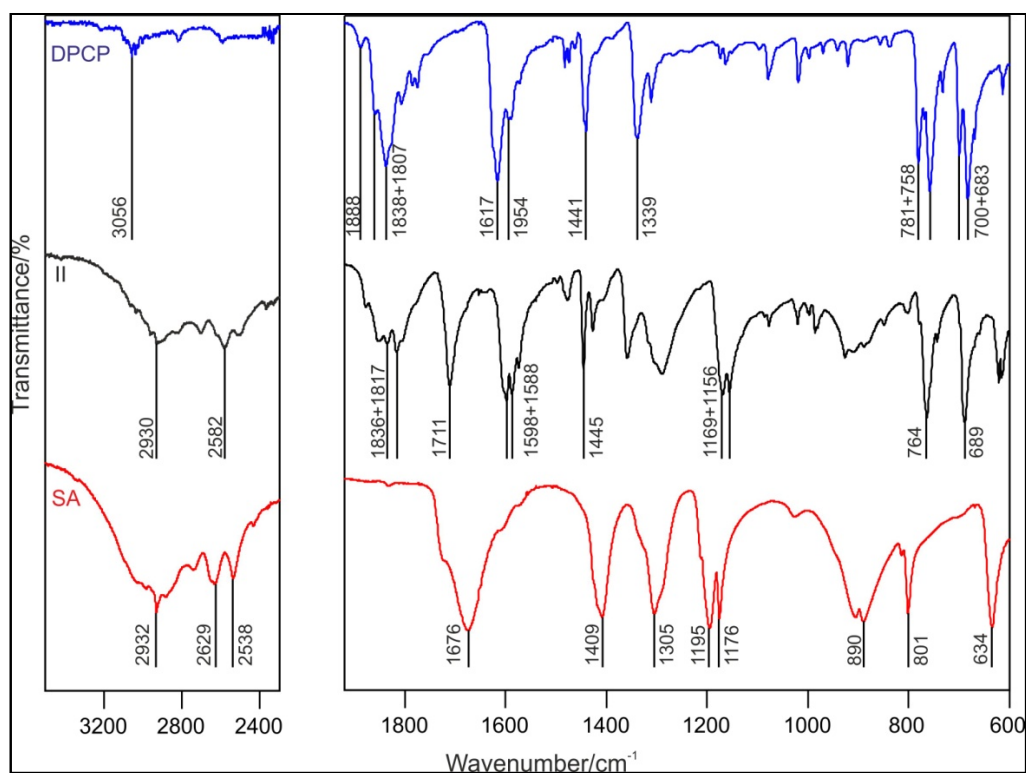

**Figure S2.** The IR spectra of diphenylcyclopropanone (blue), the cocrystal (II) produced by grinding (black), and  $\beta$ -succinic acid (red).

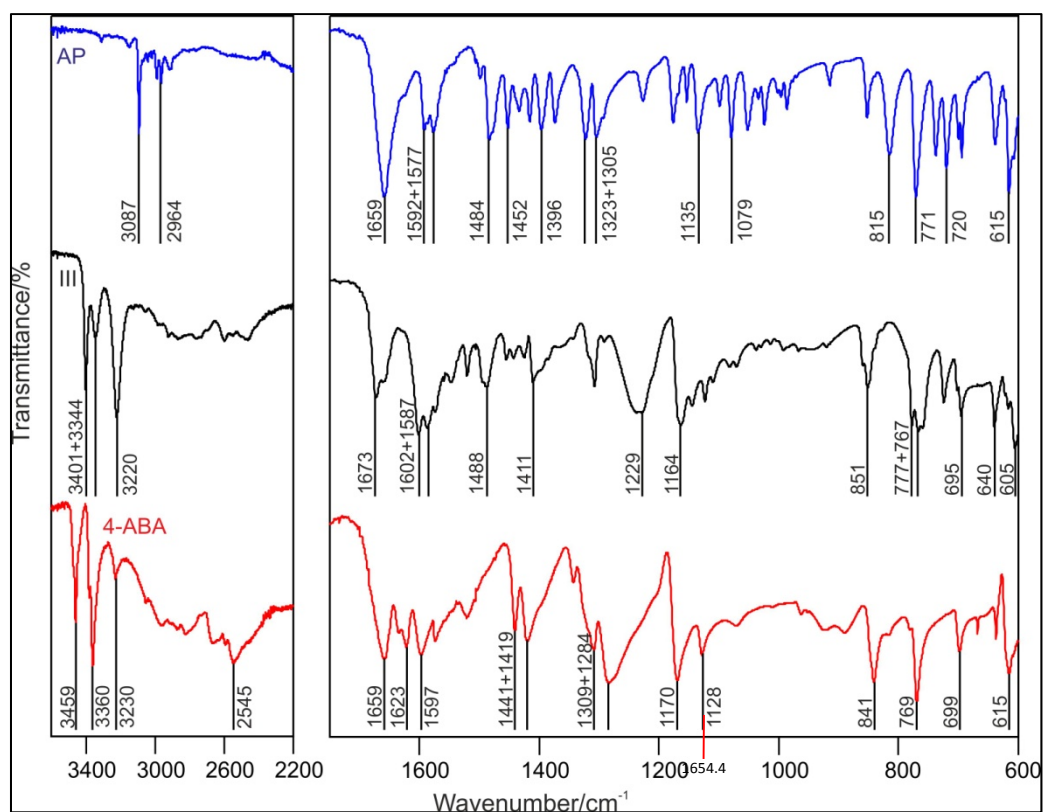

**Figure S3.** The IR spectra of antipyrine (blue), the cocrystal (III) produced by crystallization from amorphous III at 50 °C (black), and 4-aminobenzoic acid (red).

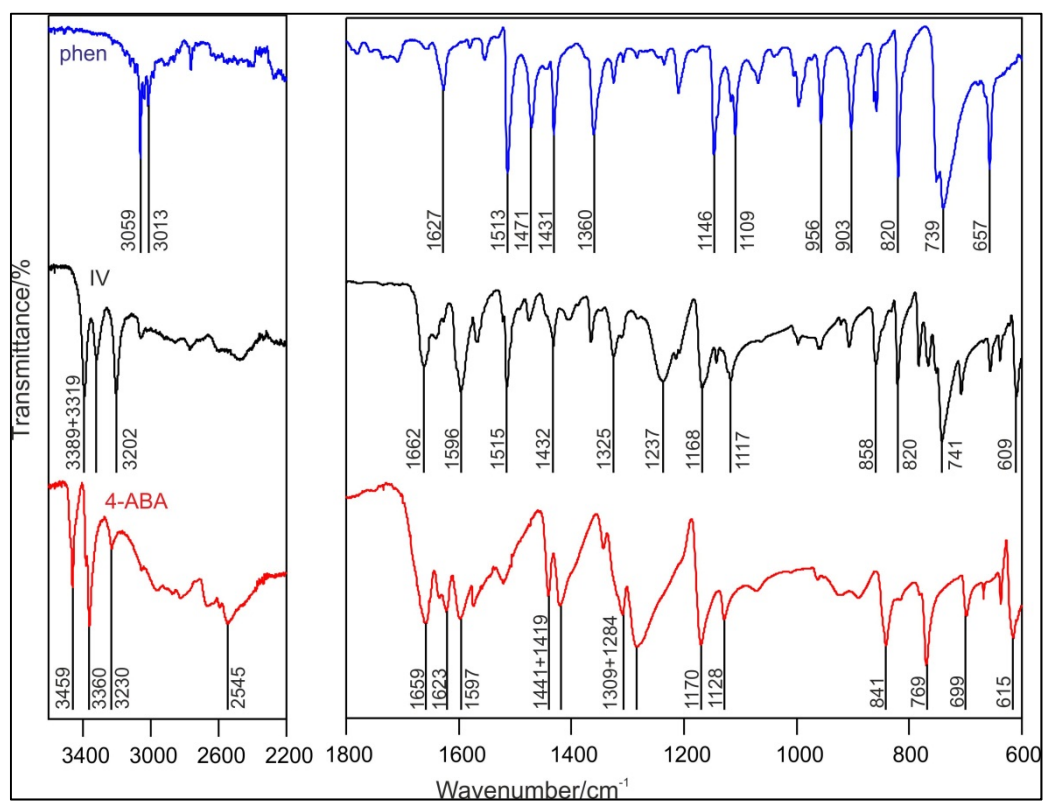

**Figure S4.** The IR spectra of phenazine (blue), the cocrystal (IV) produced by sublimation (black), and 4-aminobenzoic acid (red).

### 3 Summary of experimental screening results

**Table S2.** Overview of experimental screening results. The cocrystals with published single crystal structures which had been grown from solvents are indicated in bold and the CSD code given.

| Cocrystallizing agent | Biological building block          | Stage I<br>Indication of cocrystallization: |                           |     | Stage II                                    |
|-----------------------|------------------------------------|---------------------------------------------|---------------------------|-----|---------------------------------------------|
|                       |                                    | Neat grinding                               | Solvent assisted grinding | HSM | Single crystals of:                         |
| Succinic acid         | Metirapone                         | ×                                           | ×                         | -   | ×                                           |
|                       | β-Methyl-β-Nitrostyrene            | ×                                           | ×                         | -   | β-Methyl-β-Nitrostyrene                     |
|                       | Bifonazole                         | ×                                           | ×                         | ×   | Bifonazole                                  |
|                       | 1,4-Dicyanobenzene                 | ×                                           | ×                         | ×   | 1,4-Dicyanobenzene                          |
|                       | 1-(5-Nitro-2-Pyridyl)Benzotriazole | ×                                           | ×                         | ×   | ×                                           |
|                       | 1-(2-Pyridyl)Benzotriazole         | ×                                           | ×                         | ×   | ×                                           |
|                       | <b>Phenazine</b>                   | ×                                           | ✓                         | ✓   | <b>WOQBOT</b>                               |
|                       | Diphenylcyclopropanone             | ✓                                           | ✓                         | ✓   | Succinic acid • diphenylcyclopropanone (II) |
|                       | Antipyrine                         | ×                                           | ×                         | ×   | ×                                           |
|                       | 2,2'-Bipyridine                    | ×                                           | ✓                         | ✓   | Succinic acid • 2,2'-bipyridine (I)         |
| 4-Aminobenzoic acid   | Metirapone                         | ×                                           | ×                         | -   | ×                                           |
|                       | β-Methyl-β-Nitrostyrene            | ×                                           | ×                         | -   | ×                                           |
|                       | Bifonazole                         | ×                                           | ×                         | ×   | Bifonazole                                  |
|                       | 1,4-Dicyanobenzene                 | ×                                           | ×                         | ×   | 1,4-Dicyanobenzene                          |
|                       | 1-(5-Nitro-2-Pyridyl)Benzotriazole | ×                                           | ×                         | ×   | ×                                           |
|                       | 1-(2-Pyridyl)Benzotriazole         | ×                                           | ×                         | ×   | ×                                           |
|                       | Phenazine                          | ×                                           | ✓                         | ✓   | 4-Aminobenzoic acid • phenazine (IV)        |
|                       | Diphenylcyclopropanone             | ×                                           | ×                         | ×   | ×                                           |
|                       | Antipyrine                         | ✓                                           | ✓                         | ✓   | 4-Aminobenzoic acid • antipyrine (III)      |
|                       | <b>2,2'-Bipyridine</b>             | ×                                           | ✓                         | -   | <b>DAQYUQ</b>                               |

✓: cocrystal formation, ×: no cocrystal formation observed, -: not attempted, as large melting point difference.

## 4 Single crystal X-ray diffraction

### 4.1 Succinic acid•2,2'-bipyridine (I)

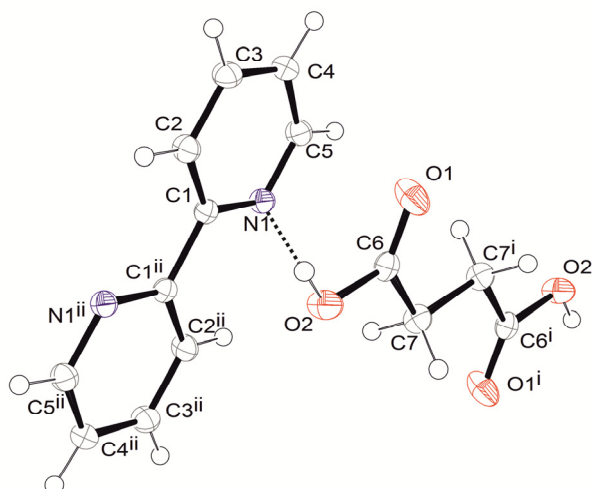

**Figure S5.** Thermal ellipsoid plots of succinic acid•2,2'-bipyridine (I). Displacement ellipsoids are drawn at the 50% probability level. Atoms generated by inversion labelled with i and ii.

**Table S3.** Geometrical parameters for intermolecular interactions in I.

| $D-H\cdots A$      | $D-H$ (Å) | $H\cdots A$ (Å) | $D\cdots A$ (Å) | $D-H\cdots A$ (°) |
|--------------------|-----------|-----------------|-----------------|-------------------|
| $O2-H1\cdots N1^i$ | 0.91(2)   | 1.87(2)         | 2.7774(14)      | 177(2)            |

Symmetry code: (i)  $x, y-1, z$ .

### 4.2 Succinic acid•diphenylcyclopropenone (II)

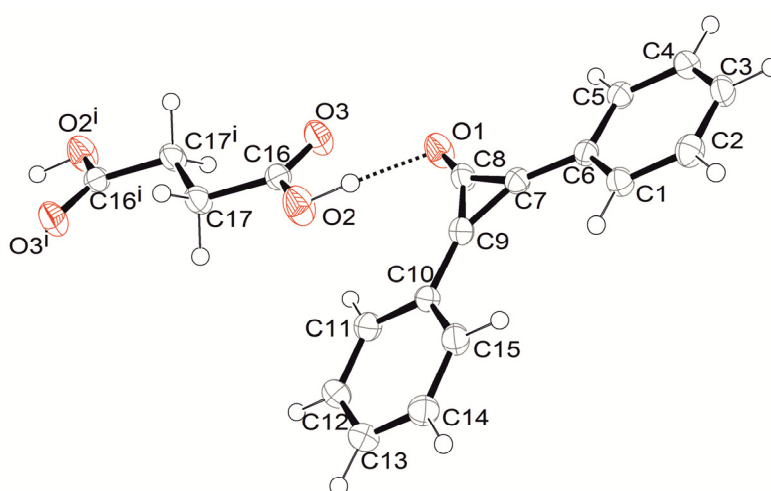

**Figure S6.** Thermal ellipsoid plots of succinic acid • diphenylcyclopropenone (II). Displacement ellipsoids are drawn at the 50% probability level. Atoms generated by inversion labelled with i.

**Table S4.** Geometrical parameters for intermolecular interactions in II.

| <i>D</i> —H··· <i>A</i>  | <i>D</i> —H (Å) | H··· <i>A</i> (Å) | <i>D</i> ··· <i>A</i> (Å) | <i>D</i> —H··· <i>A</i> (°) |
|--------------------------|-----------------|-------------------|---------------------------|-----------------------------|
| O2—H11···O1 <sup>i</sup> | 0.96 (3)        | 1.68 (3)          | 2.6351 (15)               | 170 (2)                     |

Symmetry code: (i) *x*,  $-y+3/2$ ,  $z+1/2$ .

**4.3 4-Aminobenzoic acid•antipyrine (III)**

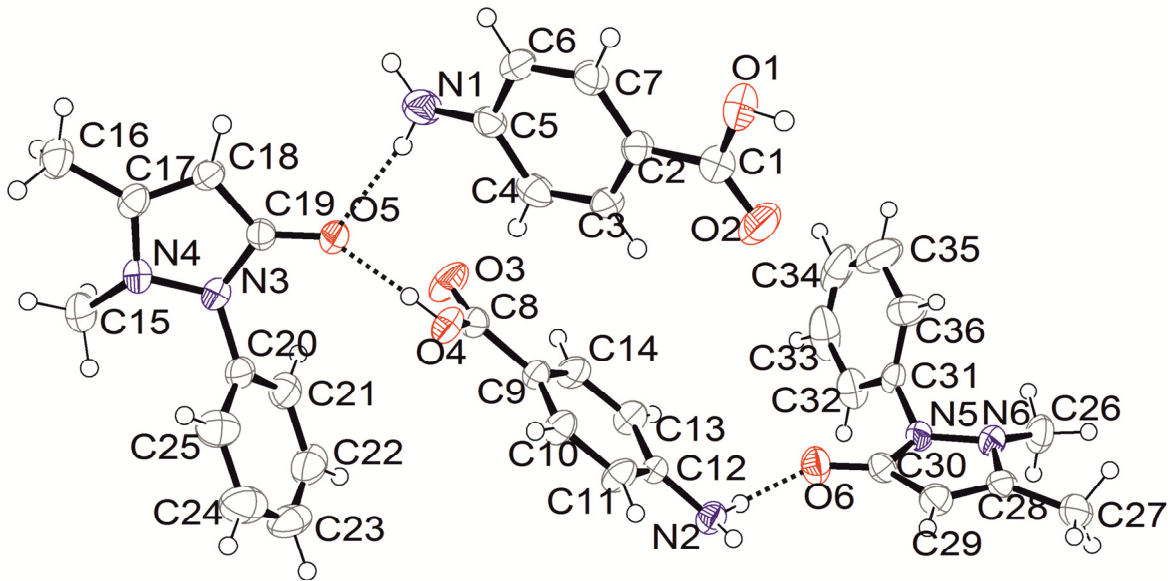

**Figure S7.** Asymmetric unit of 4-aminobenzoic acid•antipyrine (III). Displacement ellipsoids are drawn at the 50 % probability level.

**Table S5.** Geometrical parameters for intermolecular interactions in III.

| <i>D</i> —H··· <i>A</i>    | <i>D</i> —H (Å) | H··· <i>A</i> (Å) | <i>D</i> ··· <i>A</i> (Å) | <i>D</i> —H··· <i>A</i> (°) |
|----------------------------|-----------------|-------------------|---------------------------|-----------------------------|
| N1—H4···O5                 | 0.81 (4)        | 2.14 (4)          | 2.946 (4)                 | 170 (3)                     |
| N1—H5···O3 <sup>i</sup>    | 0.92 (4)        | 2.18 (4)          | 3.065 (4)                 | 163 (3)                     |
| N2—H11···O2 <sup>ii</sup>  | 0.85 (3)        | 2.08 (3)          | 2.923 (4)                 | 171 (3)                     |
| N2—H12···O6 <sup>iii</sup> | 0.89 (3)        | 2.09 (4)          | 2.971 (4)                 | 173 (3)                     |
| O1—H1···O6 <sup>iv</sup>   | 0.852(10)       | 1.752(12)         | 2.598 (3)                 | 172 (4)                     |
| O4—H8···O5                 | 0.84(3)         | 1.78(4)           | 2.597 (3)                 | 164 (4)                     |

Symmetry codes: (i)  $-x+1$ ,  $y-1/2$ ,  $-z+2$ ; (ii)  $-x+2$ ,  $y+1/2$ ,  $-z+1$ ; (iii)  $x+1$ ,  $y$ ,  $z$ ; (iv)  $x+1$ ,  $y-1$ ,  $z$ .



4.4 4-Aminobenzoic acid•phenazine (IV)

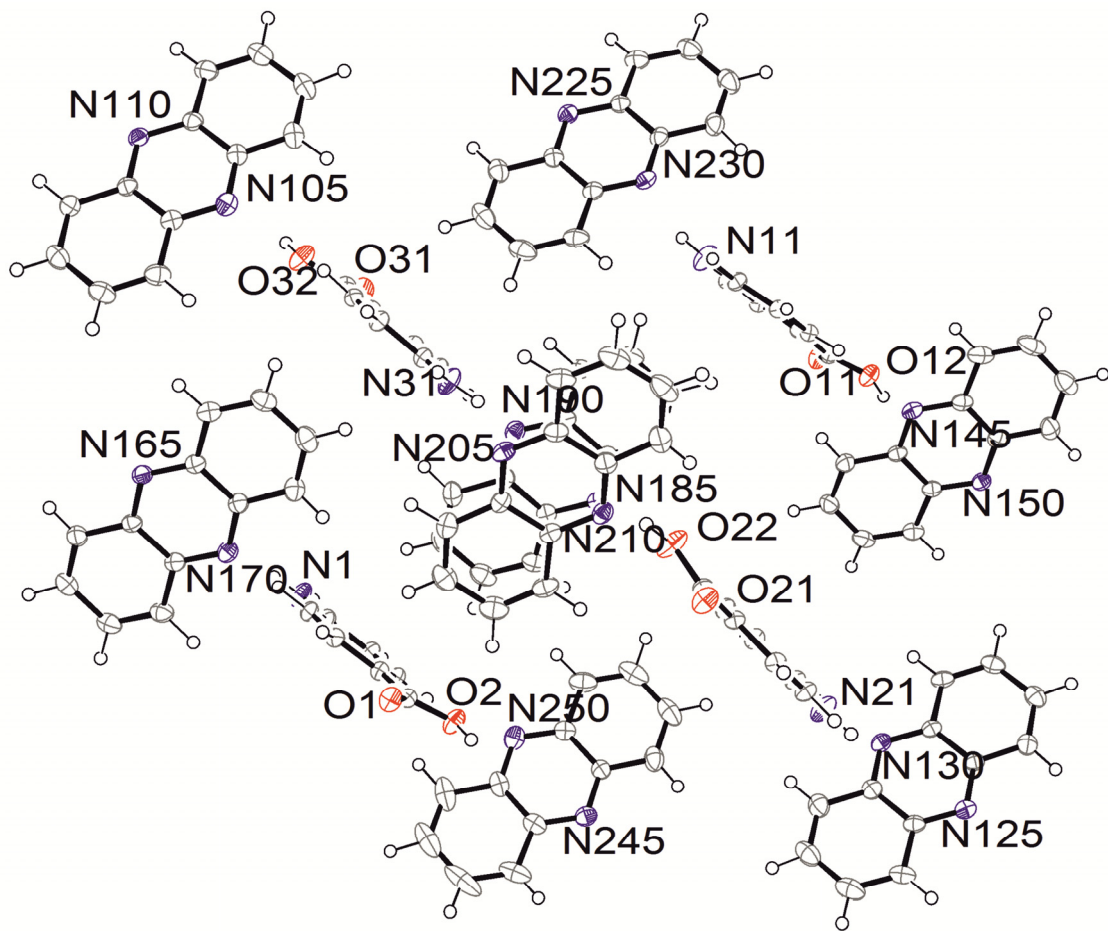

**Figure S8.** Asymmetric unit of 4-aminobenzoic acid•Phenazine (IV). Displacement ellipsoids are drawn at the 50 % probability level. Hydrogen bonds are omitted for clarity.

**Table S6.** Geometrical parameters for intermolecular interactions in IV.

| <i>D</i> —H··· <i>A</i>         | <i>D</i> —H (Å) | H··· <i>A</i> (Å) | <i>D</i> ··· <i>A</i> (Å) | <i>D</i> —H··· <i>A</i> (°) |
|---------------------------------|-----------------|-------------------|---------------------------|-----------------------------|
| N1—H1B···O11 <sup>i</sup>       | 0.94 (2)        | 1.98 (2)          | 2.894 (2)                 | 165 (2)                     |
| N1—H1A···N165 <sup>ii</sup>     | 0.85 (2)        | 2.18 (2)          | 3.034 (2)                 | 176 (2)                     |
| N11—H11A···O1 <sup>iii</sup>    | 0.89 (2)        | 2.04 (2)          | 2.919 (2)                 | 170 (2)                     |
| N11—H11B···N245 <sup>iv</sup>   | 0.90 (2)        | 2.16 (2)          | 3.055 (2)                 | 173 (2)                     |
| N21—H21A···O31 <sup>iii</sup>   | 0.90 (2)        | 2.00 (2)          | 2.8827 (19)               | 167.4 (19)                  |
| N21—H21B···N110 <sup>v</sup>    | 0.93 (2)        | 2.15 (2)          | 3.057 (2)                 | 166 (2)                     |
| N31—H31A···N185 <sup>iii</sup>  | 0.86 (3)        | 2.17 (3)          | 3.025 (2)                 | 173 (2)                     |
| N31—H31B···O21 <sup>vi</sup>    | 0.92 (2)        | 2.00 (2)          | 2.902 (2)                 | 165 (2)                     |
| O2—H2A···N225 <sup>vii</sup>    | 0.96 (3)        | 1.76 (3)          | 2.6873 (18)               | 161 (2)                     |
| O12—H12A···N150 <sup>viii</sup> | 0.99 (3)        | 1.75 (3)          | 2.7112 (19)               | 161 (3)                     |
| O22—H22A···N205 <sup>vi</sup>   | 1.02 (3)        | 1.71 (3)          | 2.7061 (19)               | 163 (3)                     |
| O32—H32A···N125 <sup>ix</sup>   | 0.97 (3)        | 1.76 (3)          | 2.7036 (18)               | 163 (3)                     |

Symmetry codes: (i)  $-x+2, -y+1, -z+1$ ; (ii)  $-x+1, -y+1, -z$ ; (iii)  $-x+1, -y+1, -z+1$ ; (iv)  $x, y+1, z$ ; (v)  $x, y-1, z+1$ ; (vi)  $-x, -y+1, -z+1$ ; (vii)  $x, y-1, z$ ; (viii)  $-x+2, -y+1, -z+2$ ; (ix)  $x, y+1, z-1$ .



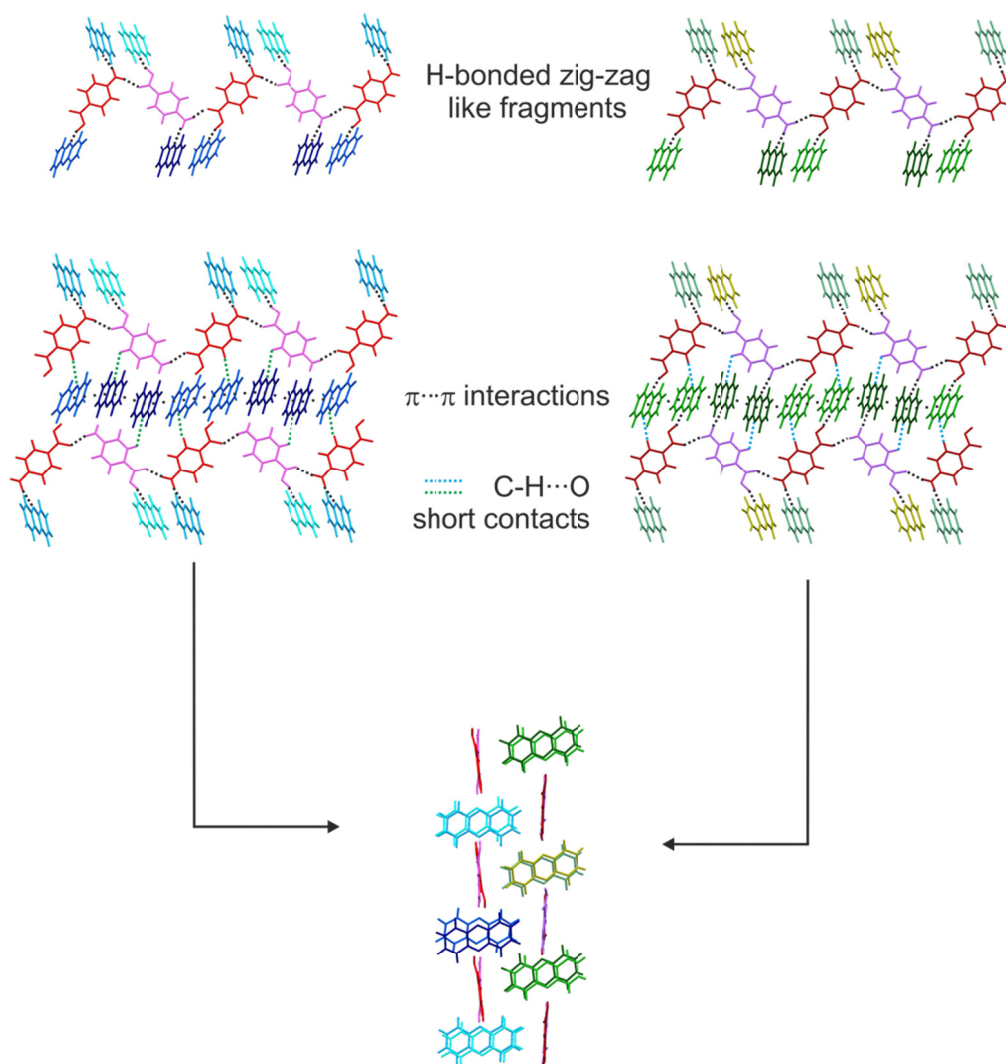

**Figure S9.** Packing diagram for 4-ABA•phenazine (IV) showing the two crystallographically distinct zig-zag like fragments, the interactions in between each of the two distinct sheets, and the stacking of the two sheets. Independent molecules are coded by shades of colour.

## 5 Computational

### 5.1 Conformational Analysis of succinic acid

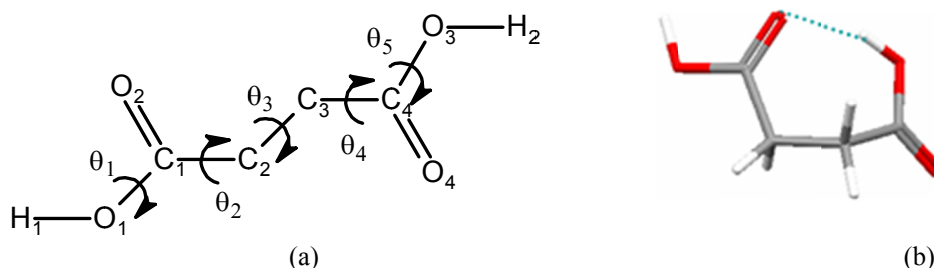

**Figure S10.** (a) The five torsion angles of succinic acid. The molecule is depicted in the planar conformation with  $\theta_1 = \text{H}_1\text{O}_1\text{C}_1\text{C}_2 = 180^\circ$ ,  $\theta_2 = \text{O}_1\text{C}_1\text{C}_2\text{C}_3 = 180^\circ$ ,  $\theta_3 = \text{C}_1\text{C}_2\text{C}_3\text{C}_4 = 180^\circ$ ,  $\theta_4 = \text{O}_3\text{C}_4\text{C}_3\text{C}_2 = -180^\circ$  and  $\theta_5 = \text{H}_2\text{O}_3\text{C}_4\text{C}_3 = -180^\circ$ . For clarity the hydrogen atoms on the carbon chain are not shown. (b) A local minimum in the conformational energy of succinic acid with an intramolecular hydrogen bond.

Succinic acid (SA) has 5 torsion angles (Figure S10a) that may vary in crystal structures, though  $\theta_1$  and  $\theta_5$  as well as  $\theta_2$  and  $\theta_4$  are symmetry related in the gas phase and in many crystals. The CSD (Version 1.11, Nov 08) was used to search for structures that contained neutral SA, whose coordinates are fully determined with no disorder and an R-factor  $\leq 10\%$ . If multiple entries of the same structure in the CSD existed, the one with the lowest R-factor determined at the lowest temperature, with a preference for any neutron determinations was used. In total 56 experimental structures containing succinic acid were found, which, given that some had more than one succinic acid in the asymmetric unit, gave a total 62 inequivalent neutral succinic acid conformations in crystal structures, which were analyzed using Vista.

The conformational minima for the isolated molecule were determined at the MP2/631G(d,p) level of theory, using GAUSSIAN03, following various scans of the conformational potential energy surface. The global minimum conformation was non-planar, with  $\theta_3 = -66.1^\circ$ . Hence Figure S11 depicts two sections of the conformational energy surface for varying the carboxylic acid torsions  $\theta_2$  and  $\theta_4$ , one corresponding  $\theta_3 = -66.1^\circ$  and the other for a planar conformation  $\theta_3 = 180^\circ$ . Since all succinic acid molecules in the crystal structures had either  $57^\circ < |\theta_3| < 72^\circ$  or  $170^\circ < |\theta_3| < 180^\circ$  torsion angles, their conformations could be represented on Figure S11. The only local minima in the conformational energy surface which is not shown schematically on Figure S11 is an internally hydrogen bonded conformation shown in Figure S10b.

The overwhelming majority of the succinic acid molecules in the crystalline environment, 50/62 are approximately planar in Conf A, close to the local energy minima (Figure S11a and Table S15). The majority of cases where the succinic conformation is not Conf A, appears to correlate with the other molecules in the crystal structure having a complex structure with multiple hydrogen bond donor/acceptor groups located so that there are severe steric restrictions on forming hydrogen bonds with a planar (Conf A) succinic acid molecule. The molecules in WOJHEI and JAZBES adopt the high energy planar conformation with the carboxylic acid groups rotated (Conf B) in order to form the hydrogen bonds. The succinic acid is non-planar in Conf C, approximating the most stable gas phase structure, in JEDLAG01, QEVMEJ and SERMOR10, and in Conf. E, the related local energy minimum, in CIRXAD, JEKDUY, KIJSEC, KTHSUC, OLOFUQ and one molecule of PEKQOM. The only structure not close to a freely optimised conformation is the second molecule in PEKQOM, which approximates Conf D (Figure S11b) enabling it to form hydrogen bonds with 4 partner molecules.

**Table S7.** Freely optimized conformations of succinic acid and their frequency of occurrence in experimental crystal structures.

| Conformation                     | $\Delta\text{MP2}^{\text{a}}$<br>(kJ/mol) | $\Delta\text{HF}^{\text{b}}$<br>(kJ/mol) | $\theta_3$ | $\theta_2$ | $\theta_4$ | $\theta_1$ | $\theta_5$ | Crystal<br>structures <sup>c</sup> |
|----------------------------------|-------------------------------------------|------------------------------------------|------------|------------|------------|------------|------------|------------------------------------|
| <b>Conf C</b>                    | -                                         | -                                        | -66.01     | 170.30     | 170.21     | 179.54     | 179.55     | 3                                  |
| <b>Conf E</b>                    | 5.60                                      | 8.10                                     | -59.28     | -178.64    | -31.23     | 179.47     | 179.66     | 6                                  |
| <b>Conf A</b>                    | 6.37                                      | 1.86                                     | 177.29     | 177.13     | 177.06     | 179.56     | 179.56     | 50                                 |
| <b>Intramolecular<br/>H-bond</b> | 15.77                                     | 20.06                                    | -79.59     | -168.66    | 69.02      | -178.93    | -1.47      | 0                                  |
| <b>Conf B</b>                    | 17.82                                     | 21.10                                    | 178.94     | 1.94       | 56.37      | 179.97     | -179.92    | 2                                  |

<sup>a</sup>The energies, relative to Conf C, of these structures, freely optimised at the MP2 6-31G(d,p) level of theory. <sup>b</sup>The relative SCF component of this energy. <sup>c</sup>The number of succinic acid molecules in crystal structures which approximate this conformation. Only one molecule is too far from any of these structures to be included (see Conf D region on Fig. S11(b) for this structure and Figs. 11 spread of structures in each conformational class).

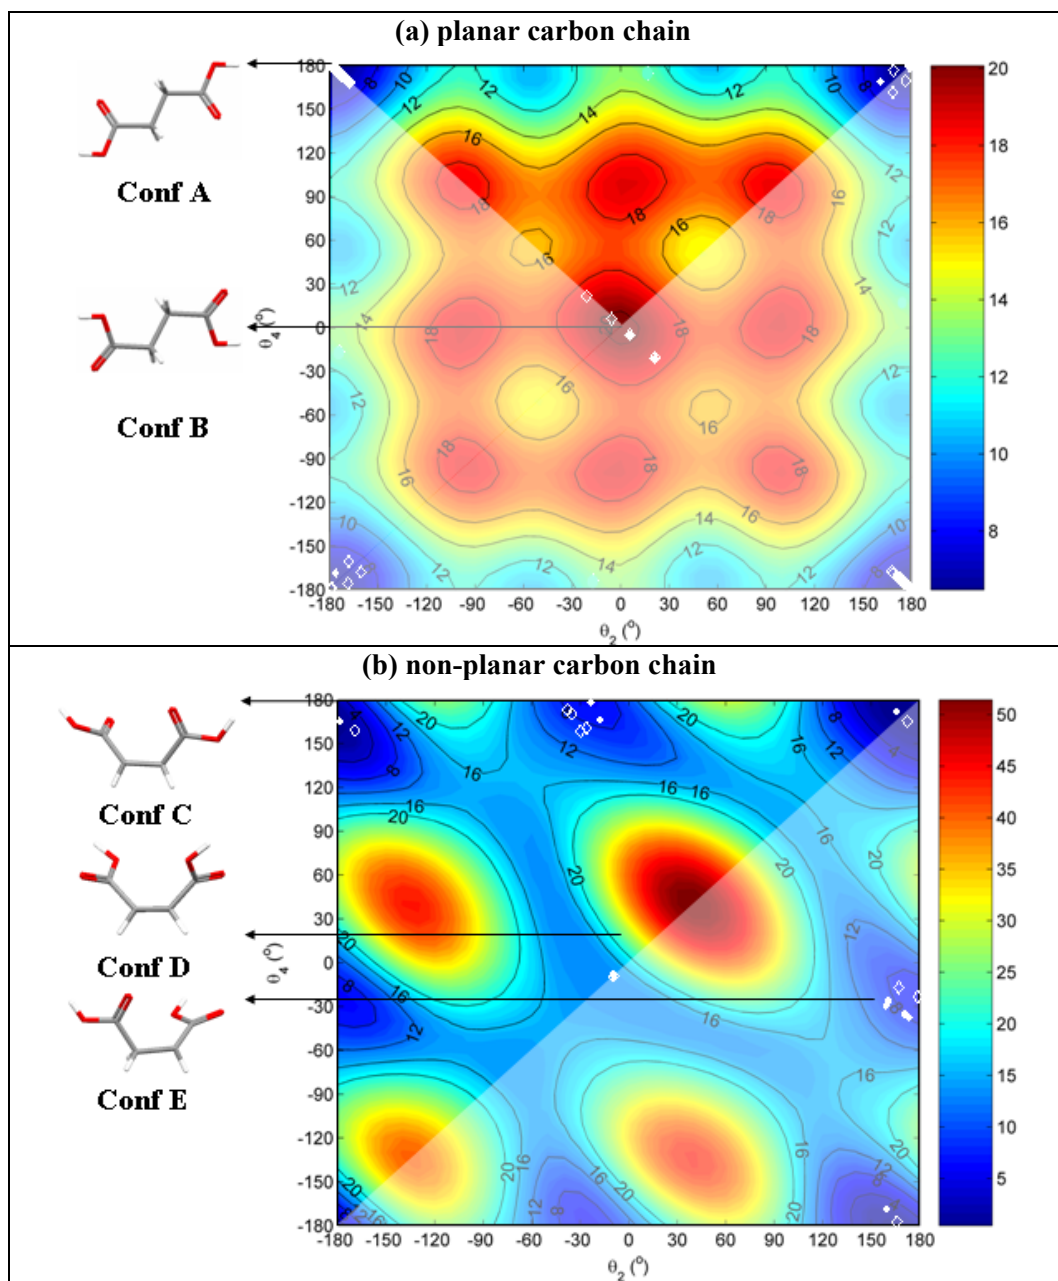

**Figure S11.** MP2/6-31G(d,p) relaxed intramolecular energy ( $\text{kJ mol}^{-1}$ ) scans for succinic acid as a function of rotation about the two carboxylic acid groups, for (a) the planar conformation with the carbon chain torsion ( $\theta_3 = \text{C}_1\text{-C}_2\text{-C}_3\text{-C}_4$ ) constrained to  $180^\circ$  and (b) with  $\theta_3 = \text{C}_1\text{-C}_2\text{-C}_3\text{-C}_4$  constrained to  $-66.1^\circ$ . In both scans the carboxylic acid groups were constrained to the planar geometry. The molecular symmetry of the isolated molecule is represented by shading the symmetry equivalent areas. The conformations observed in crystal structures are shown by full diamonds for the conformation observed in the CSD as generated by the program Vista, with open diamonds denoting the symmetry equivalent conformations.

## 5.2 Details of the lattice energy landscapes

The following lattice energy landscapes show two levels of accuracy in evaluating the relative lattice energies and refining the crystal structures. The lattice energy landscape for

each search shows all the low energy crystal structures found by treating the molecule structures as rigid in the MP2/6-31G(d,p) optimised isolated molecule conformation. In this approximation, the lattice energy is just the intermolecular lattice energy,  $U_{\text{inter}}$ , calculated with a distributed multipole electrostatic model and the FIT repulsion-dispersion potential. The lower energy structures were further refined by allowing specified torsion angles (see m/s Table 1) to respond to the packing forces, by optimising  $E_{\text{latt}}=U_{\text{inter}}+\Delta E_{\text{intra}}$ , where  $\Delta E_{\text{intra}}$ , is the MP2/6-31G(d,p) energy penalty for the change in conformation. The resulting minima are also shown, joined to the starting rigid-body structure, indicating the lowering in lattice energy that results from considering this conformational flexibility. All the experimental crystal structures are compared with the nearest structure found in the search after optimising  $E_{\text{latt}}=U_{\text{inter}}+\Delta E_{\text{intra}}$  in Table S8.

### 5.2.1 Succinic acid

The succinic acid crystal energy landscape is divided into the  $Z'=1$  search (Figure S12a), for comparability with the other searches and a  $Z'=2$  search (Figure S12b) to test whether the methodology could find the metastable  $\alpha$  polymorph. The stable  $\beta$  form is the global minimum on the lattice energy landscape, but there are several alternative packings of the  $R_2^2(8)$  carboxylic acid chain motif that are more stable than the observed metastable polymorph. This may reflect the poorer reproduction of the structure of the  $\alpha$  polymorph (Table S16). Non-planar conformations gave rise to crystal structures that were so much less dense than those generated with the planar conformation that they required a separate plot (Figure S13a) and seem unlikely to be feasible polymorphs.

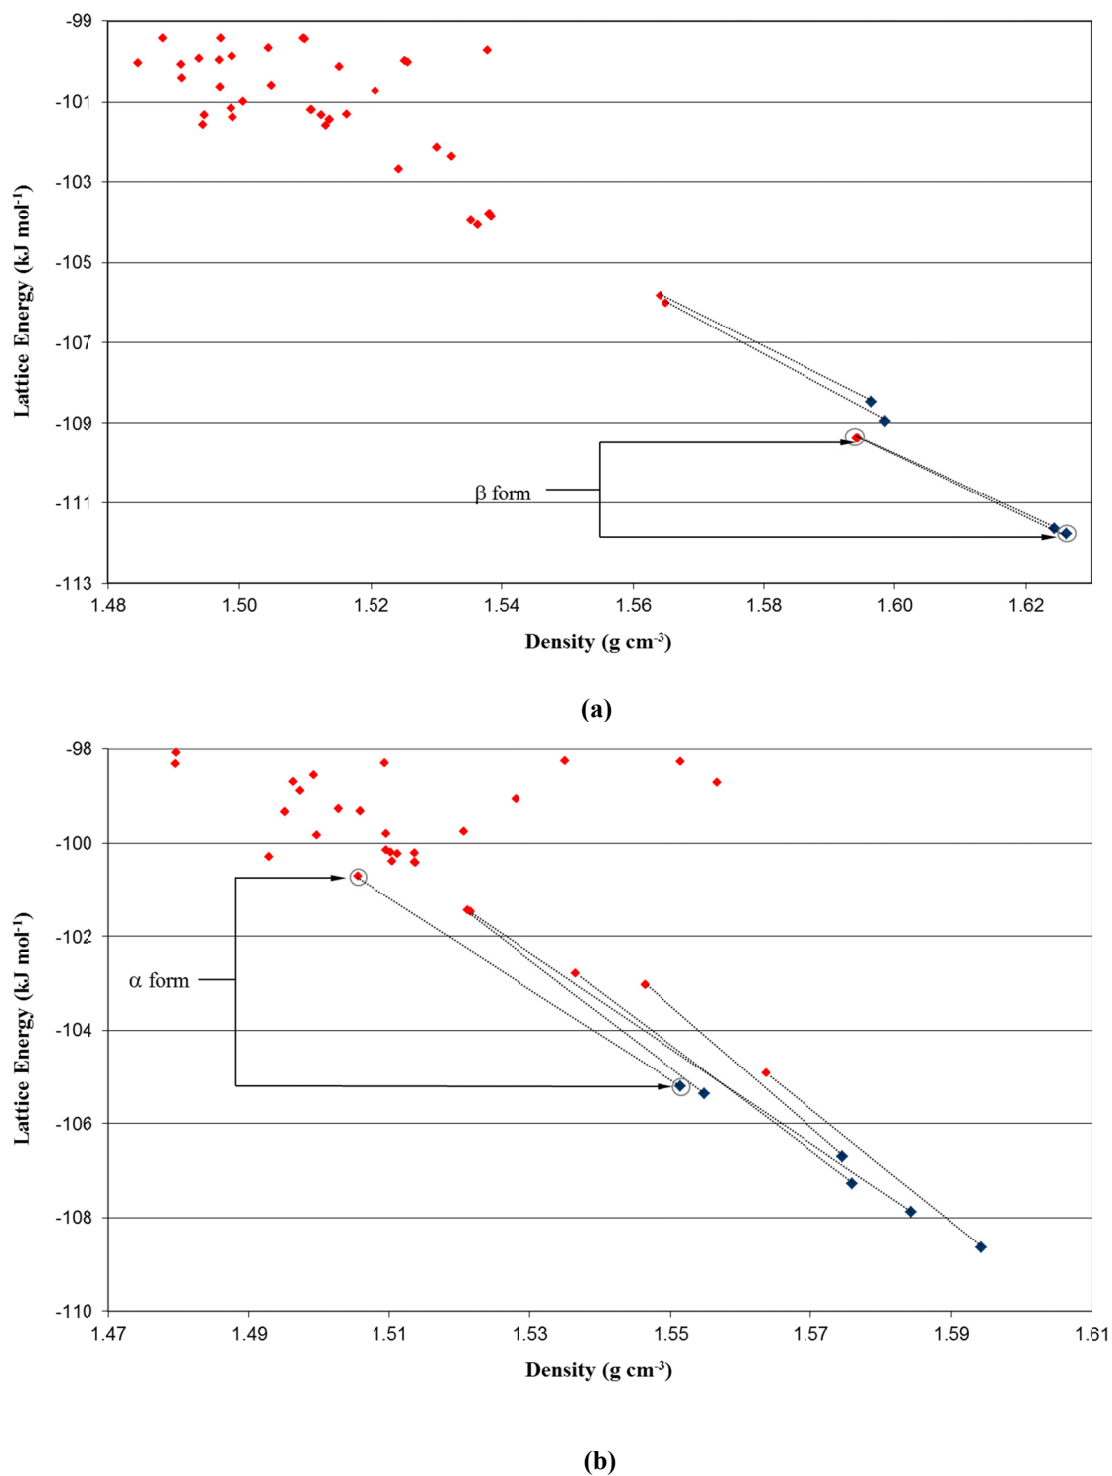

**Figure S12.** Lattice energy landscapes for succinic acid for a search of (a)  $Z'=1$  structures and (b)  $Z'=2$  search structures using Conf A. The red symbols indicate energy minima obtained after the rigid body search, which are connected by dashed lines to the corresponding minima (blue symbols), when the 5 torsion angles are allowed to change in response to the intermolecular forces. The open circles denote the corresponding minima starting from the experimental structures.

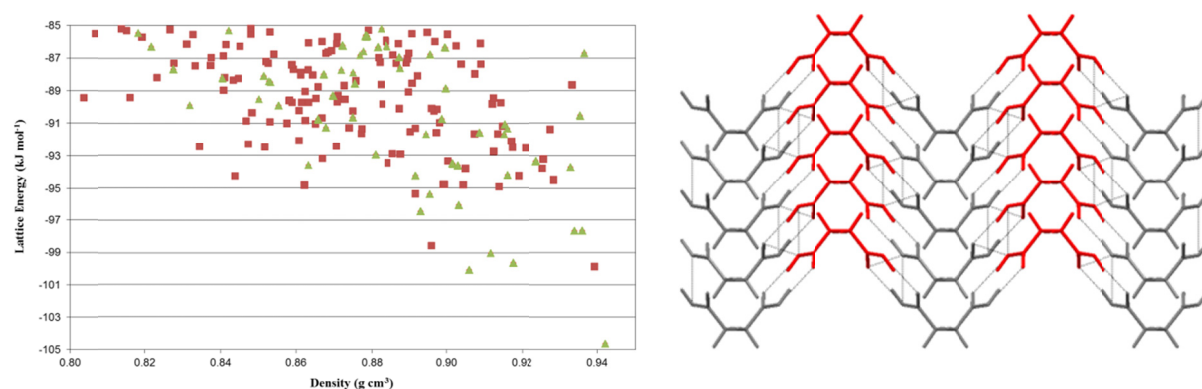

**Figure S13.** Hypothetical crystal structures for non-planar succinic acid. (a) Lattice energy landscape generated for the non-planar conformations **Conf C** and **Conf E** of succinic acid. (b) The ribbon motifs of the global minimum structure with the non-planar conformation C of succinic acid.

### 5.2.2 1,4-Dicyanobenzene

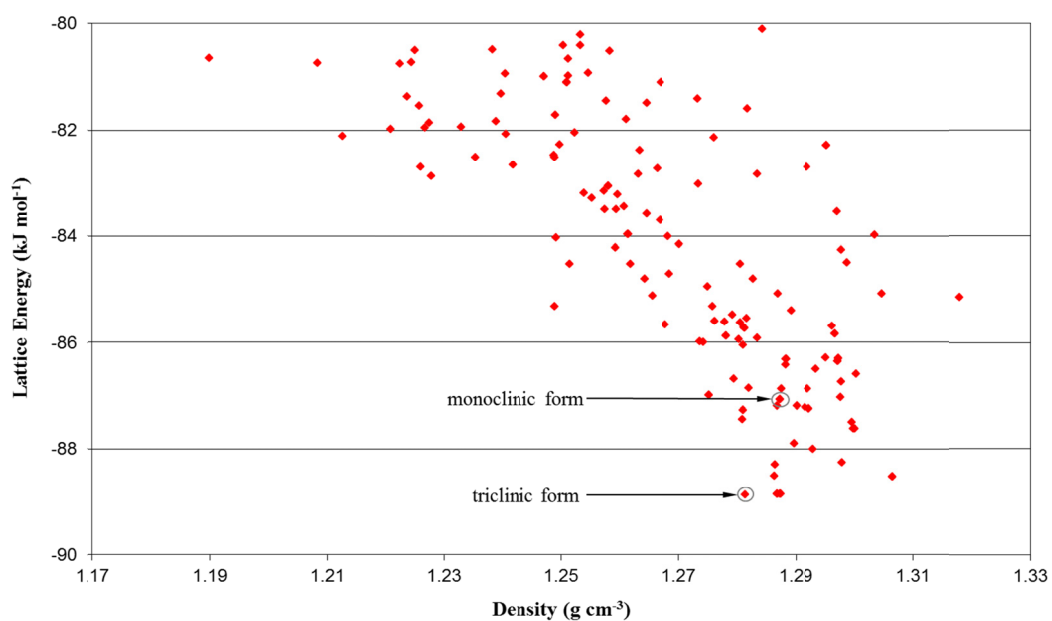

**Figure S14.** Lattice energy landscape for 1,4-dicyanobenzene. The red symbols indicate lattice energy minima obtained after the rigid body and the open circles denote the known experimental structures.



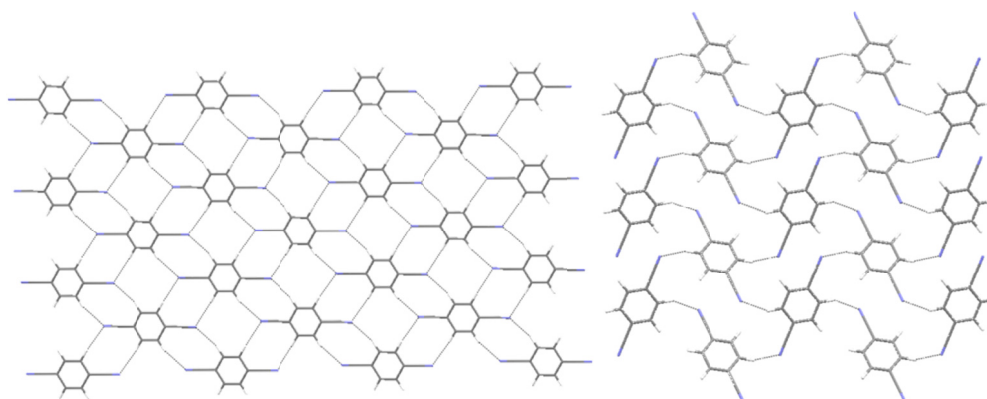

**Figure S15.** Packing motifs of 1,4-dicyanobenzene polymorphs (left) ribbon type motif observed for the triclinic structure and (right) ladder type motif observed for the monoclinic structure. These motifs are seen in the other low energy structures.

### 5.2.3 2,2'-Bipyridine

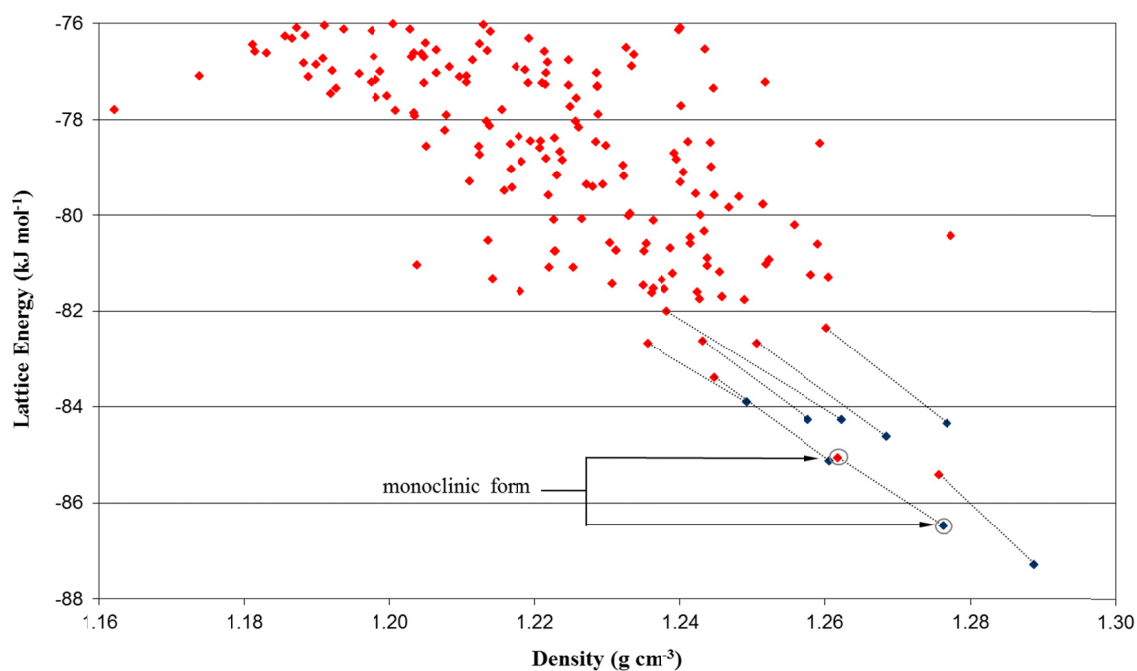

**Figure S16.** Lattice energy landscape for 2,2'-bipyridine. The red symbols indicate energy minima obtained after the rigid body search, which are connected by dashed lines to the corresponding minima, blue symbols, when the central torsion angle is allowed to change in response to the intermolecular forces. The open circles denote the corresponding minima starting from the experimental structure.

### 5.2.4 Succinic acid•2,2'-bipyridine cocrystal

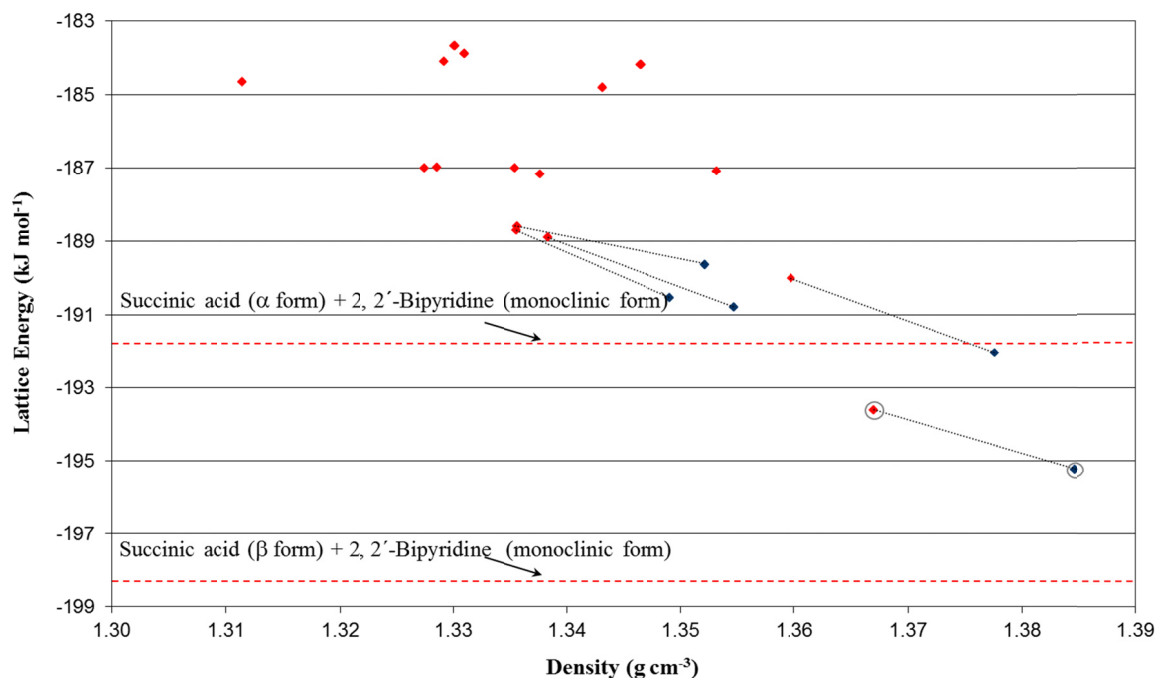

**Figure S17.** Lattice energy landscape for 1:1 cocrystals of succinic acid•2,2'-bipyridine. The red symbols indicate energy minima obtained after the rigid body search, which are connected by dashed lines to the corresponding minima, blue symbols, when the 5 succinic acid and 1 bipyridine torsion angles are allowed to change in response to the intermolecular forces. The open circles denote the corresponding minima starting from the experimental structure. The red dashed lines indicate the sum of the lattice energies for the pure components.

5.2.5 Succinic acid•1,4-dicyanobenzene 1:1 cocrystal

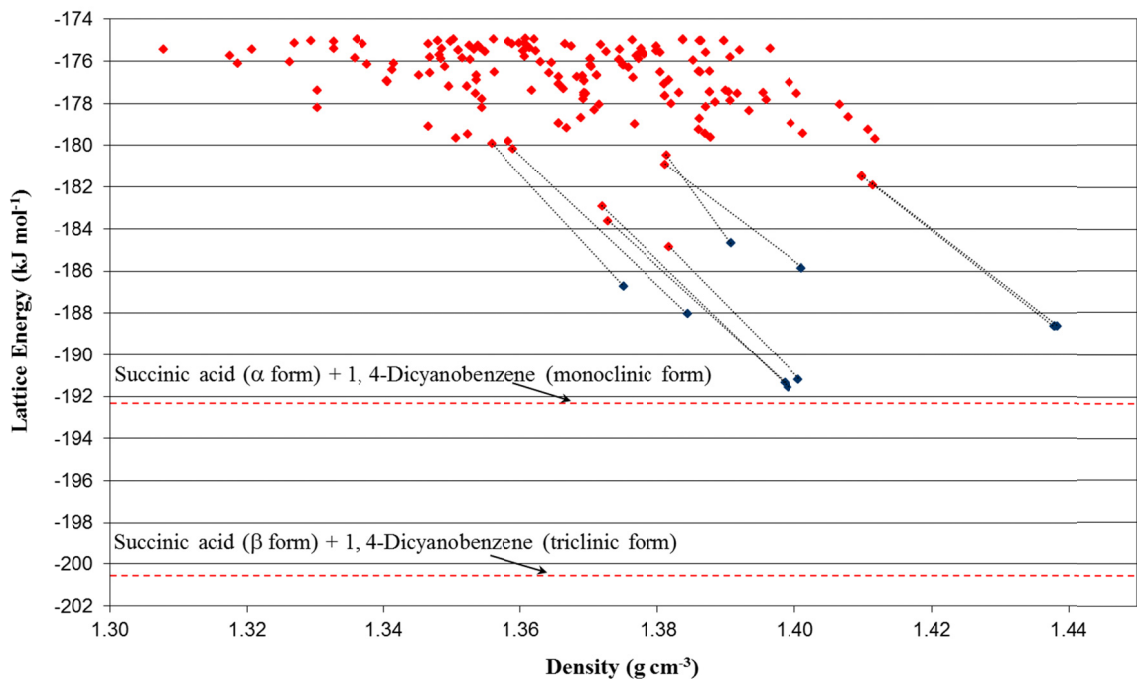

**Figure S18.** Lattice energy landscape for the hypothetical cocrystal of succinic acid•1,4-dicyanobenzene. The red symbols indicate energy minima obtained after the rigid body search, which are connected by dashed lines to the corresponding minima, blue symbols, when the 5 succinic acid torsion angles are allowed to change in response to the intermolecular forces. The red dashed lines indicate the sum of the lattice energies for the pure components.

**Table S8.** Comparison of structures found in the searches with the experimental crystal structures.

|                                                | a / Å | b / Å | c / Å  | α / °  | β / °  | γ / ° | Density / g cm <sup>-3</sup> | E <sub>latt</sub> / kJ/mol | RMSD <sub>15</sub> / Å |
|------------------------------------------------|-------|-------|--------|--------|--------|-------|------------------------------|----------------------------|------------------------|
| <b>Succinic Acid</b>                           |       |       |        |        |        |       |                              |                            |                        |
| Expt α <i>P</i> -1                             | 5.727 | 6.867 | 7.198  | 101.84 | 109.10 | 97.18 | 1.531                        |                            |                        |
| Calc                                           | 5.983 | 6.515 | 7.282  | 101.80 | 109.69 | 99.74 | 1.551                        | -105.19                    | 0.30                   |
| Expt β <i>P</i> <sub>2</sub> <sub>1</sub> /c   | 5.526 | 8.881 | 5.105  |        | 91.49  |       | 1.566                        |                            |                        |
| Calc                                           | 5.392 | 8.707 | 5.147  |        | 93.49  |       | 1.626                        | -111.78                    | 0.20                   |
| <b>1,4-dicyanobenzene</b>                      |       |       |        |        |        |       |                              |                            |                        |
| Expt <i>P</i> <sub>2</sub> <sub>1</sub>        | 3.868 | 7.080 | 12.127 |        | 97.21  |       | 1.291                        |                            |                        |
| Calc                                           | 3.755 | 7.356 | 12.163 |        | 100.27 |       | 1.287                        | -87.08                     | 0.30                   |
| Expt <i>P</i> -1                               | 3.847 | 6.585 | 7.322  | 114.50 | 93.60  | 96.90 | 1.279                        |                            |                        |
| Calc                                           | 3.654 | 6.660 | 7.651  | 113.96 | 95.67  | 97.88 | 1.281                        | -88.87                     | 0.34                   |
| <b>2,2'-bipyridine</b>                         |       |       |        |        |        |       |                              |                            |                        |
| Expt <i>P</i> <sub>2</sub> <sub>1</sub> /c     | 5.486 | 6.165 | 12.376 |        | 110.92 |       | 1.326                        |                            |                        |
| Calc                                           | 5.656 | 6.264 | 12.318 |        | 111.36 |       | 1.276                        | 86.48                      | 0.16                   |
| <b>2,2'-bipyridine•succinic acid cocrystal</b> |       |       |        |        |        |       |                              |                            |                        |
| Expt <i>P</i> <sub>2</sub> <sub>1</sub> /c     | 8.958 | 5.178 | 14.357 |        | 106.11 |       | 1.423                        |                            |                        |
| Calc                                           | 9.423 | 5.132 | 14.089 |        | 105.06 |       | 1.385                        | -195.23                    | 0.25                   |

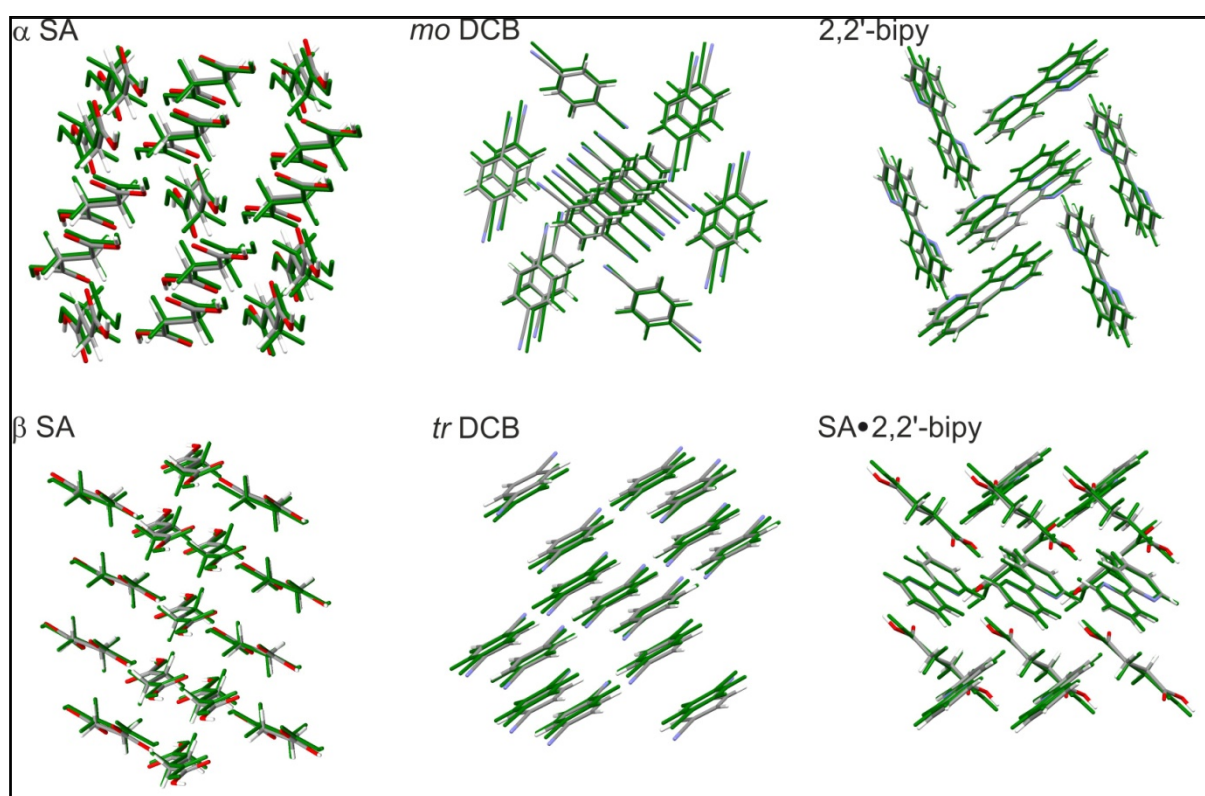

**Figure S19.** Overlay of the experimental (coloured by element) and the corresponding structures found in the search (green). *Mo* – monoclinic; *tr* – triclinic.
